# Supplementary material
Source: publisher figshare collection journal article supplement (https://acs.figshare.com/ndownloader/files/3885370)
Supplement: Supplementary file 1 [file 3885370]

Supporting information for

**Solar Light Driven Pure Water Splitting on Quantum Sized BiVO<sub>4</sub> without any  
Co-Catalyst**

Songmei Sun, Wenzhong Wang\*, Dezhi Li, Ling Zhang, Dong Jiang

State Key Laboratory of High Performance Ceramics and Superfine Microstructure,  
Shanghai Institute of Ceramics, Chinese Academy of Sciences, Shanghai 200050, P.

R. China

\*Address correspondence to [wzwang@mail.sic.ac.cn](mailto:wzwang@mail.sic.ac.cn)

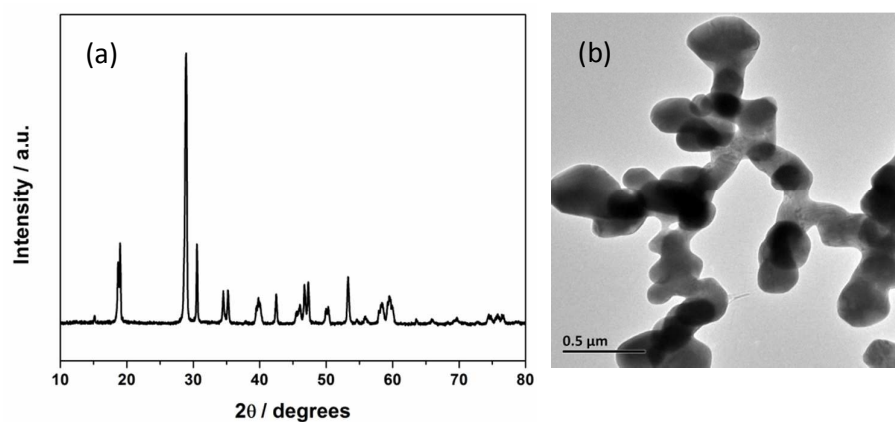

Figure S1 XRD (a) and TEM image (b) of the as-prepared nanoscale BiVO<sub>4</sub> sample.

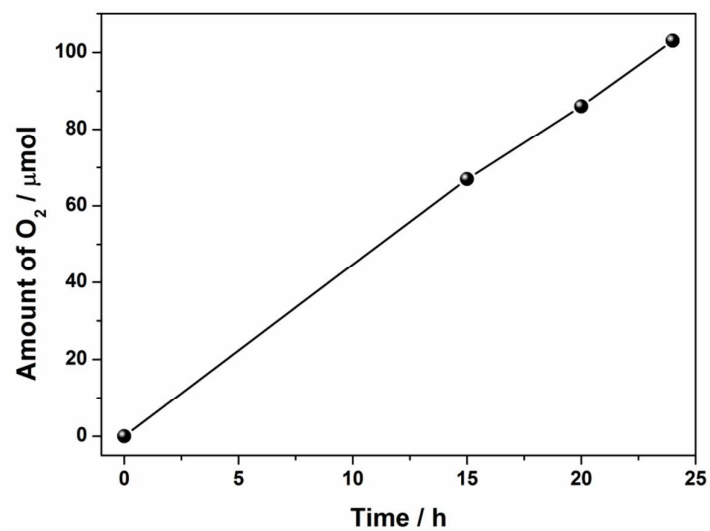

Figure S2 Photocatalytic oxygen evolution from 15 mg of quantum sized BiVO<sub>4</sub> sample in pure water.
